# Supplementary material for: Dithienocoronene diimide (DTCDI)-derived triads for high-performance air-stable, solution-processed balanced ambipolar organic field-effect transistors
Source: Royal Society of Chemistry journal article supplement (doi:10.1039/d1cp02703d), 2021-01-01
Supplement: d1cp02703d1.pdf [file d1cp02703d1.pdf]

## Supporting Information

# Dithienocoronenediimide (DTCDI)-Derived Triads for High-Performance Air-Stable, Solution-Processed Balanced Ambipolar Organic Field-Effect Transistors

Huijuan Ran,<sup>†,‡</sup> Fei Li,<sup>§,‡</sup> Rong Zheng,<sup>†</sup> Wenjing Ni,<sup>†</sup> Zheng Lei,<sup>†</sup> Fuli Xie,<sup>†</sup> Xuewei  
Duan,<sup>†</sup> Ruijun Han,<sup>†</sup> Na Pan,<sup>†</sup> and Jian-Yong Hu<sup>\*†</sup>

<sup>†</sup>Key Laboratory of Applied Surface and Colloid Chemistry, National Ministry of  
Education; Shaanxi Key Laboratory for Advanced Energy Devices; Shaanxi  
Engineering Lab for Advanced Energy Technology, School of Materials Science and  
Engineering, Shaanxi Normal University, Xian 710119, China

<sup>§</sup>Tianjin Key Laboratory of Molecular Optoelectronic Sciences, Tianjin University,  
Tianjin 300072, China

E-mail: [hujianyong@snnu.edu.cn](mailto:hujianyong@snnu.edu.cn)

## **Content**

- 1. Synthesis of dithienocoronenediimide (DTCDI)-derived triads**
- 2. Thermal gravimetric analysis (TGA)**
- 3. Differential scanning calorimetry (DSC) Measurements**
- 4. Photoelectron yield spectroscopy (PESA) measurement**
- 5. OFET device performances**
- 6. NMR spectra**
- 7. FT-TR spectrum**
- 8. Mass spectra**

## 1. Synthesis of dithienocoronenediimide (DTCDI)-derived triads

### *Synthesis of parent DTCDI*

PDI-BT <sup>[1]</sup> (220 mg, 0.175 mmol), I<sub>2</sub> (91.7 mg, 0.361 mmol) was dissolved in benzene (125 mL), and stirred for 18h with exposure in UV-light (302 nm). After the reaction was done, the solvent was evaporated in vacuum. The crude was washed with acetone and methanol, purified by column chromatography (Silica gel, hexane:dichloroform (2:1), v/v) to afford the pure product (66 mg, 30%). <sup>1</sup>H NMR (300 MHz, CDCl<sub>3</sub>, δ): 8.42 (s, 2H), 8.24 (s, 2H), 8.86-8.77 (m, 4H), 4.16 (m, 4H), 2.02 (m, 4H), 1.50-1.19 (m, 82H), 0.83 (m, 12H).

### *Synthesis of DTCDI-BT*

The dibromo intermediate DTCDI-2Br (200 mg, 0.14 mmol), 2-(tributyl)stannylthiophene (211 mg, 0.57 mmol), Pd<sub>2</sub>(dba)<sub>3</sub> (4.67 mg, 0.005 mmol), P(*o*-Tolyl)<sub>3</sub> (6.93 mg, 0.0228 mmol) were dissolved in dry chlorobenzene (27 mL) under nitrogen, and the reaction mixture was heated at 135 °C for 20 h. After cooling to room temperature, the reaction mixture was quenched with water, and extracted with toluene. The solvent was evaporated to dryness to give a solid crude product. The crude was purified by recrystallized from a large amount of chloroform to give the desired compound as a red-purple solid (0.160 g, 80% yield). IR:  $\nu = 1700$  (C=O),  $1658$  (C=O) cm<sup>-1</sup>. <sup>1</sup>H NMR (300 MHz, CDCl<sub>3</sub>, δ): 9.16 (s, 2H), 8.95 (s, 2H), 8.80 (s, 2H), 7.56-7.54 (m, 6H), 4.17 (m, 4H), 2.01

(m, 4H), 1.50-1.12 (m, 82H), 0.80 (m, 12H).  $^{13}\text{C}$  NMR spectra was not obtained due to its limited solubility. MALDI-TOF m/z: 1416.4610, calcd 1416.1392. Anal. Calcd for  $\text{C}_{90}\text{H}_{114}\text{N}_2\text{O}_4\text{S}_4$ : C, 76.33; H, 8.11; N, 1.98; S, 9.06. Found: C, 76.32; H, 8.12; N, 1.98; S, 9.05.

### ***Synthesis of DTCDI-BBT***

The synthetic procedure is similar as described for **DTCDI-BT**. Reagent used were 2-(tributyl)stannylbenzo[*b*]thiophene (168.58 mg, 0.57 mmol),  $\text{Pd}_2(\text{dba})_3$  (4.67 mg, 0.005 mmol),  $\text{P}(o\text{-Tolyl})_3$  (6.93 mg, 0.0228 mmol) and chlorobenzene (27 mL). After workup, the product was red-purple solid (161 mg, 75% yield). IR:  $\nu = 1700$  (C=O), 1658 (C=O)  $\text{cm}^{-1}$ .  $^1\text{H}$  NMR and  $^{13}\text{C}$  NMR spectra were not obtained due to its limited solubility. MALDI-TOF m/z: 1516.5774, calcd 1516.2565. Anal. Calcd for  $\text{C}_{98}\text{H}_{118}\text{N}_2\text{O}_4\text{S}_4$ : C, 77.63; H, 7.84; N, 1.85; S, 8.46 Found: C, 77.64; H, 7.83; N, 1.85; S, 8.43.

### ***Synthesis of DTCDI-BNT***

The synthetic procedure is similar as described for **DTCDI-BT**. Reagent used were 2-(tributyl)stannylnaphtho[2,3-*b*]thiophen (196.96 mg, 0.57 mmol),  $\text{Pd}_2(\text{dba})_3$  (4.67 mg, 0.005 mmol),  $\text{P}(o\text{-Tolyl})_3$  (6.93 mg, 0.0228 mmol) and chlorobenzene (27 mL). After workup, the product was red-purple solid (167 mg, 73% yield). IR:  $\nu = 1700$  (C=O), 1658 (C=O)  $\text{cm}^{-1}$ .  $^1\text{H}$  NMR and  $^{13}\text{C}$  NMR spectra were not obtained due to its limited solubility. MALDI-TOF m/z: 1616.5951, calcd 1616.3739. Anal. Calcd

for  $C_{106}H_{122}N_2O_4S_4$ : C, 78.76; H, 7.61; N, 1.73; S, 7.94 Found: C, 78.77; H, 7.63; N, 1.72; S, 7.92.

## 2. Thermal gravimetric analysis (TGA)

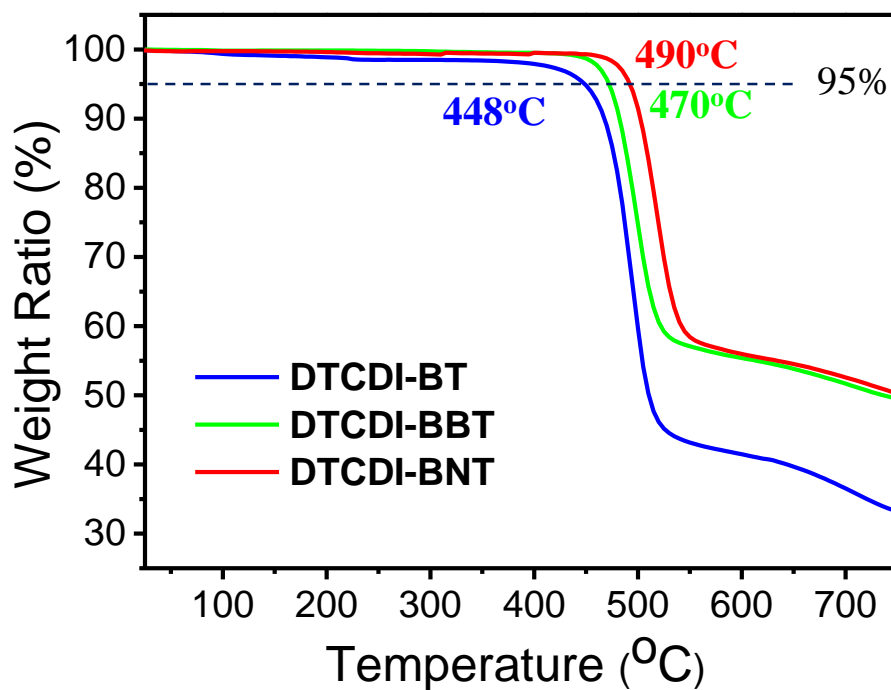

**Fig. S1** TGA plots of compounds **DTCDI-BT**, **DTCDI-BBT** and **DTCDI-BNT** under a nitrogen flow with a heating rate of 20 °C/min.

### 3. Differential Scanning Calorimetry (DSC) Measurements

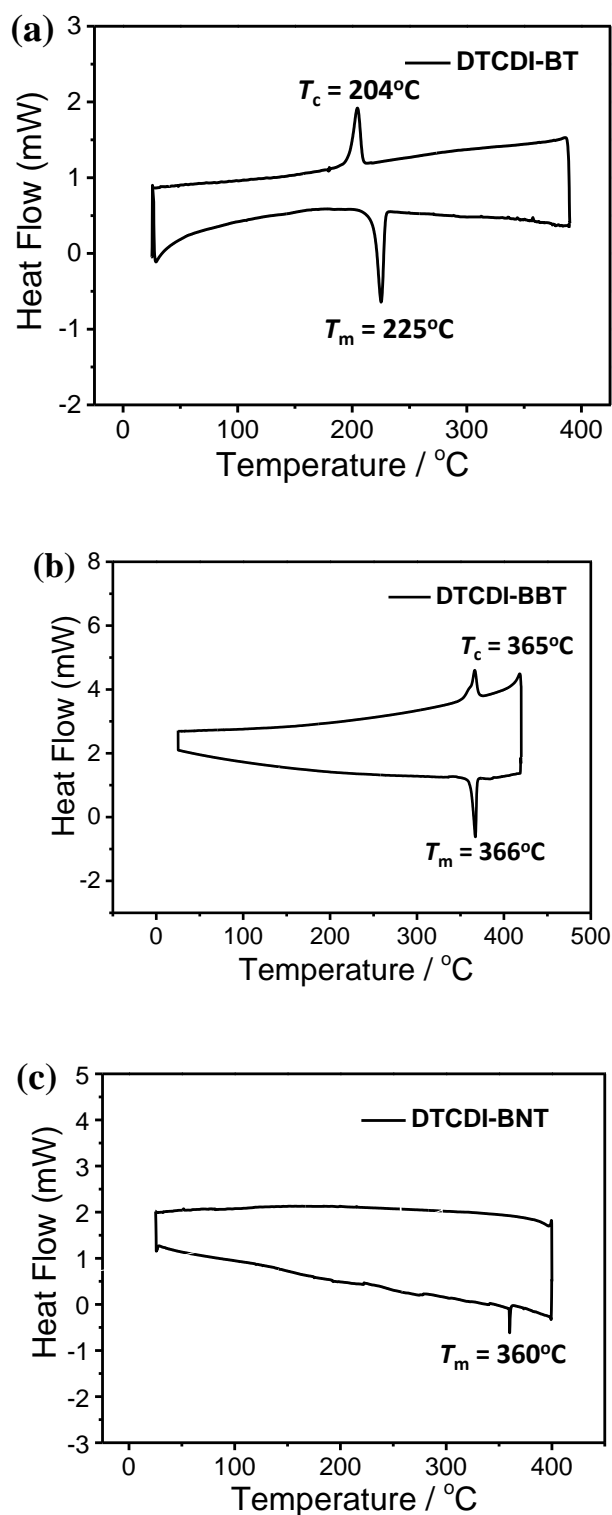

**Fig. S2** DSC curves of DTCDI-BT (a), DTCDI-BBT (b) and DTCDI-BNT (c) in the second heating-cooling cycle under a nitrogen flow with a heating rate of  $10^\circ\text{C}/\text{min}$ .

#### 4. Photoelectron yield spectroscopy (PESA) measurement

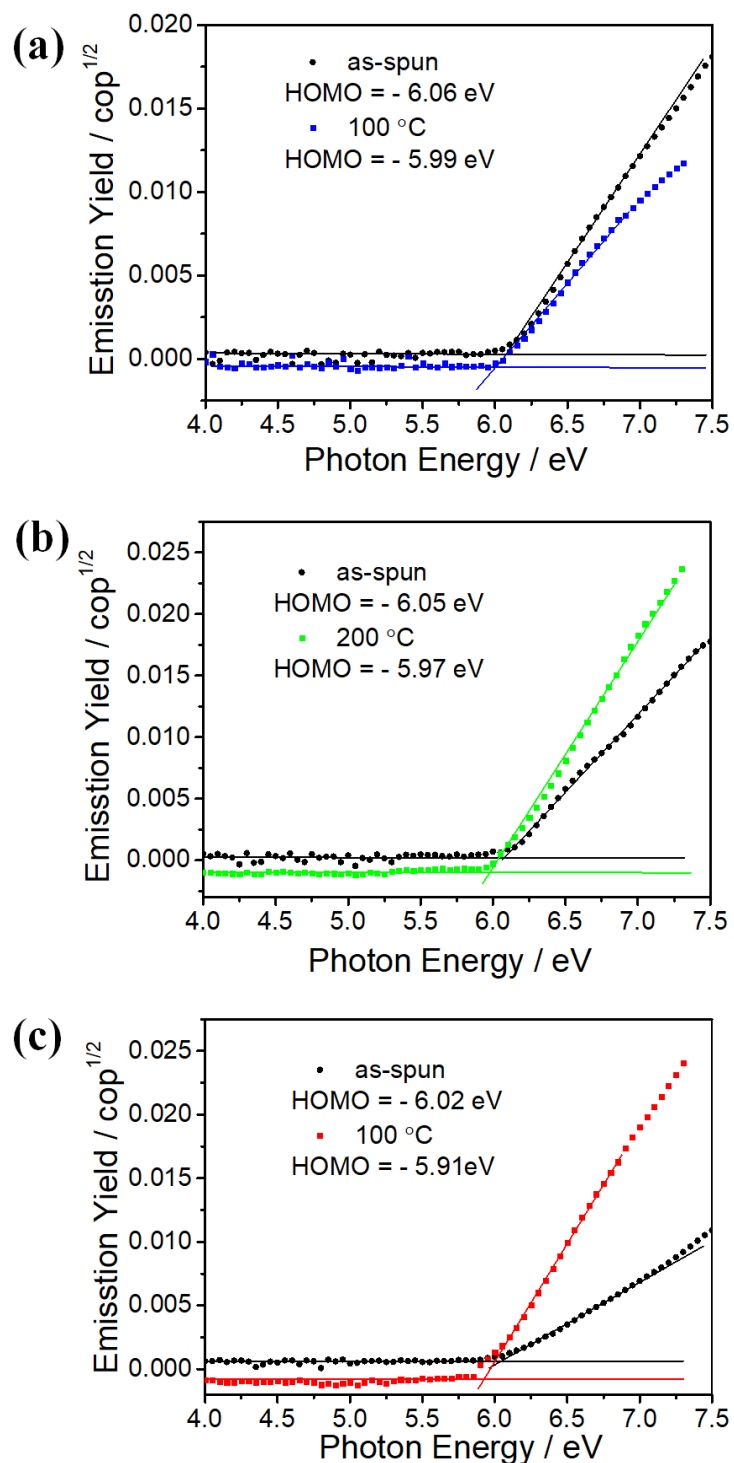

**Fig. S3** Photoelectron yield spectroscopy in air (PESA) spectra of **DTCDI-BT** (a), **DTCDI-BBT** (b) and **DTCDI-BNT** (c) in a spin-coated film on a precleaned ITO substrate annealed along with that of as-spun film.

## 5. OFET Fabrication and Measurement

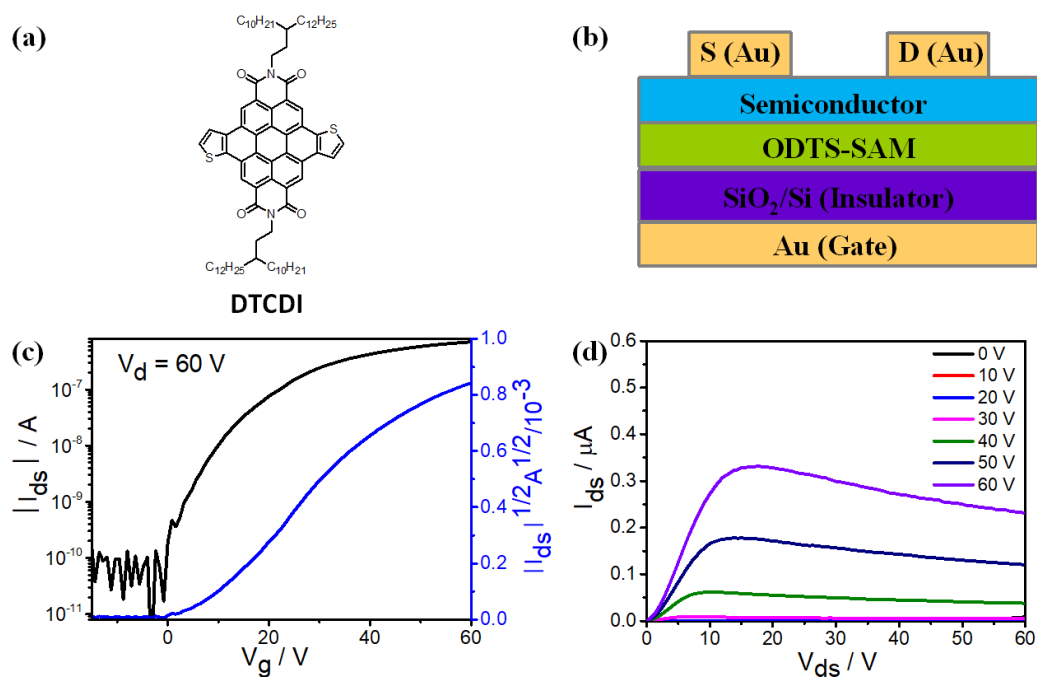

**Fig. S4** (a) Chemical structures of **DTCDI**; (b) Schematic representation of bottom-gate top-contact device architecture used in this work; Transfer and output characteristics for EFTs with **DTCDI**-based as-spun thin film (c, d) evaluated under ambient conditions.



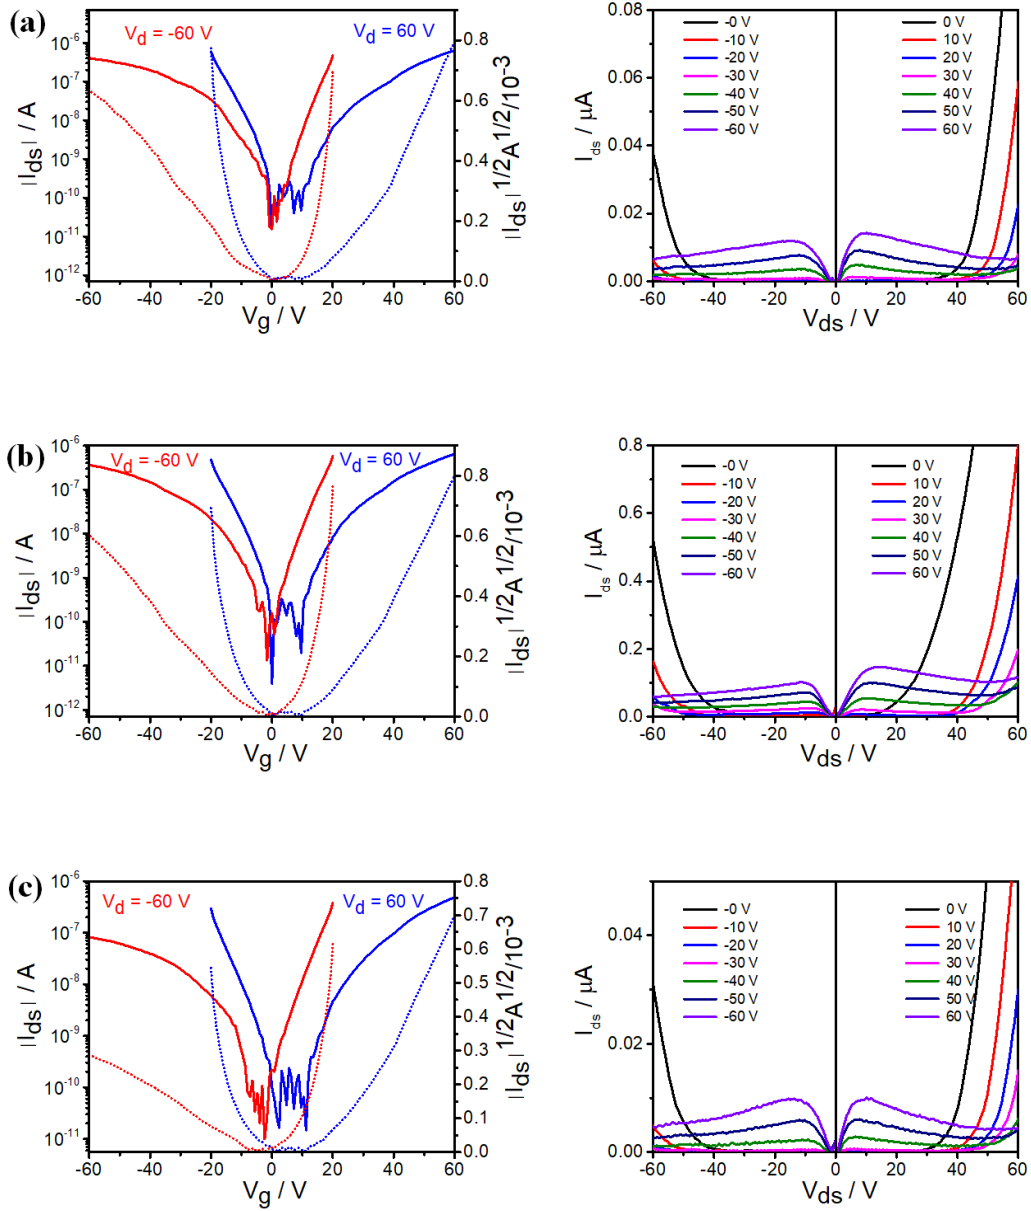

**Fig. S5** Transfer (left) and output (right) characteristic curves of BGTC transistors based on **DTCDI-BT** evaluated under ambient conditions at different thermal annealing temperatures together: (a) 100°C; (b) 150°C; (c) 200°C.

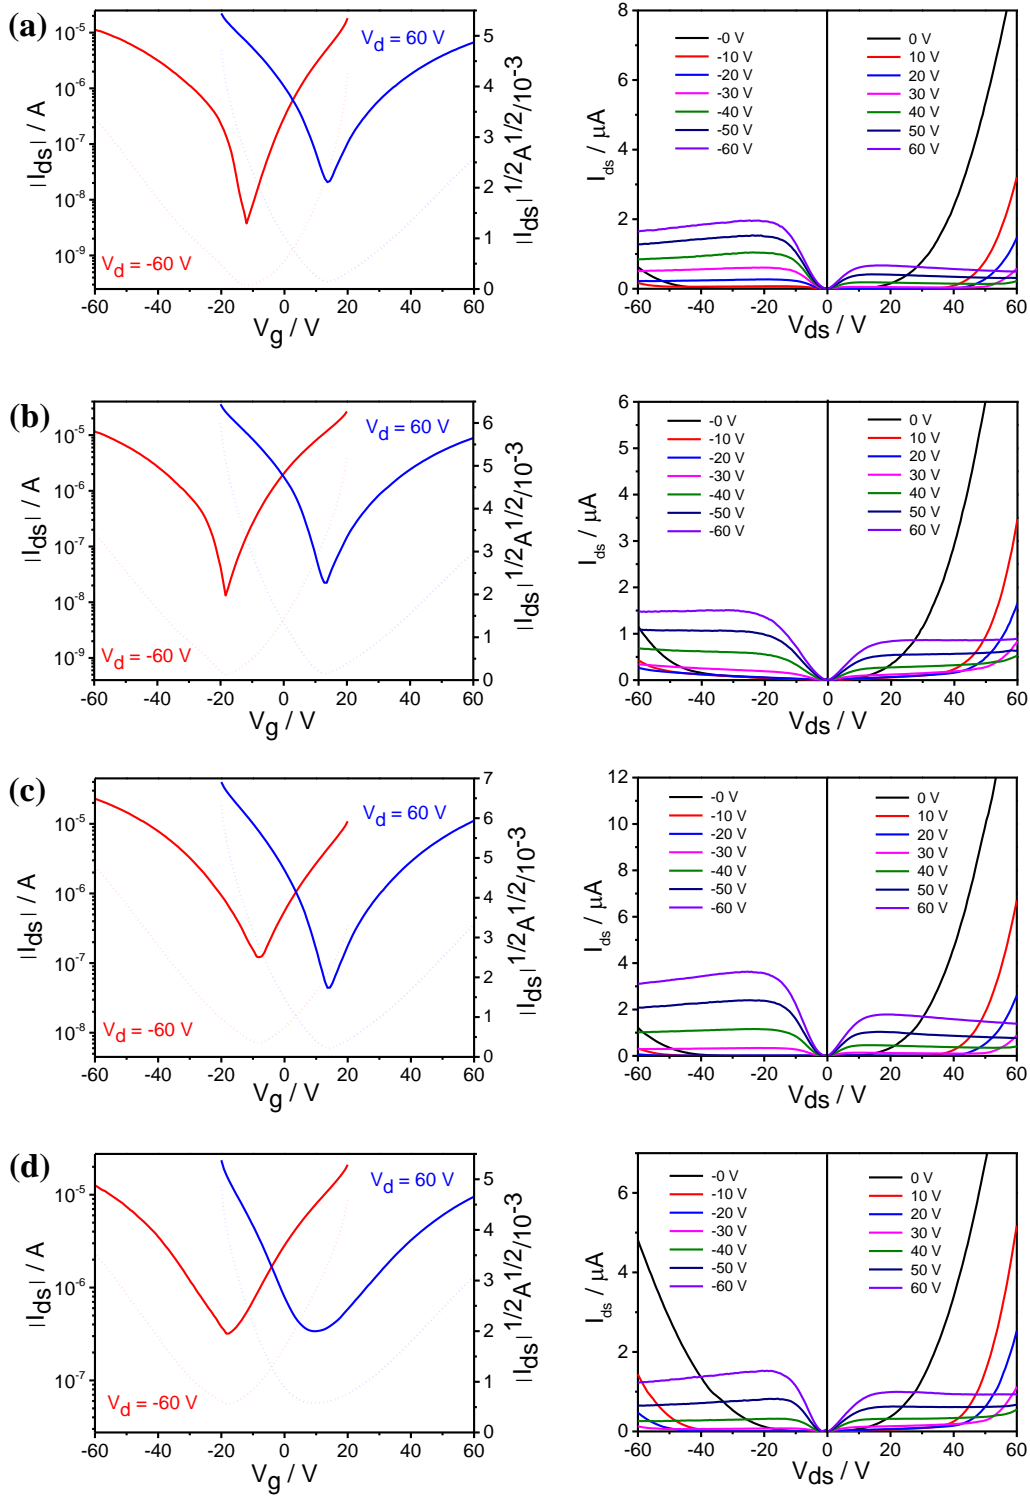

**Fig. S6** Transfer (left) and output (right) characteristic curves of BGTC transistors based on **DTCDI-BBT** evaluated under ambient conditions at different thermal annealing temperatures together: (a) 100°C; (b) 150°C; (c) 200°C; (d) 250°C.

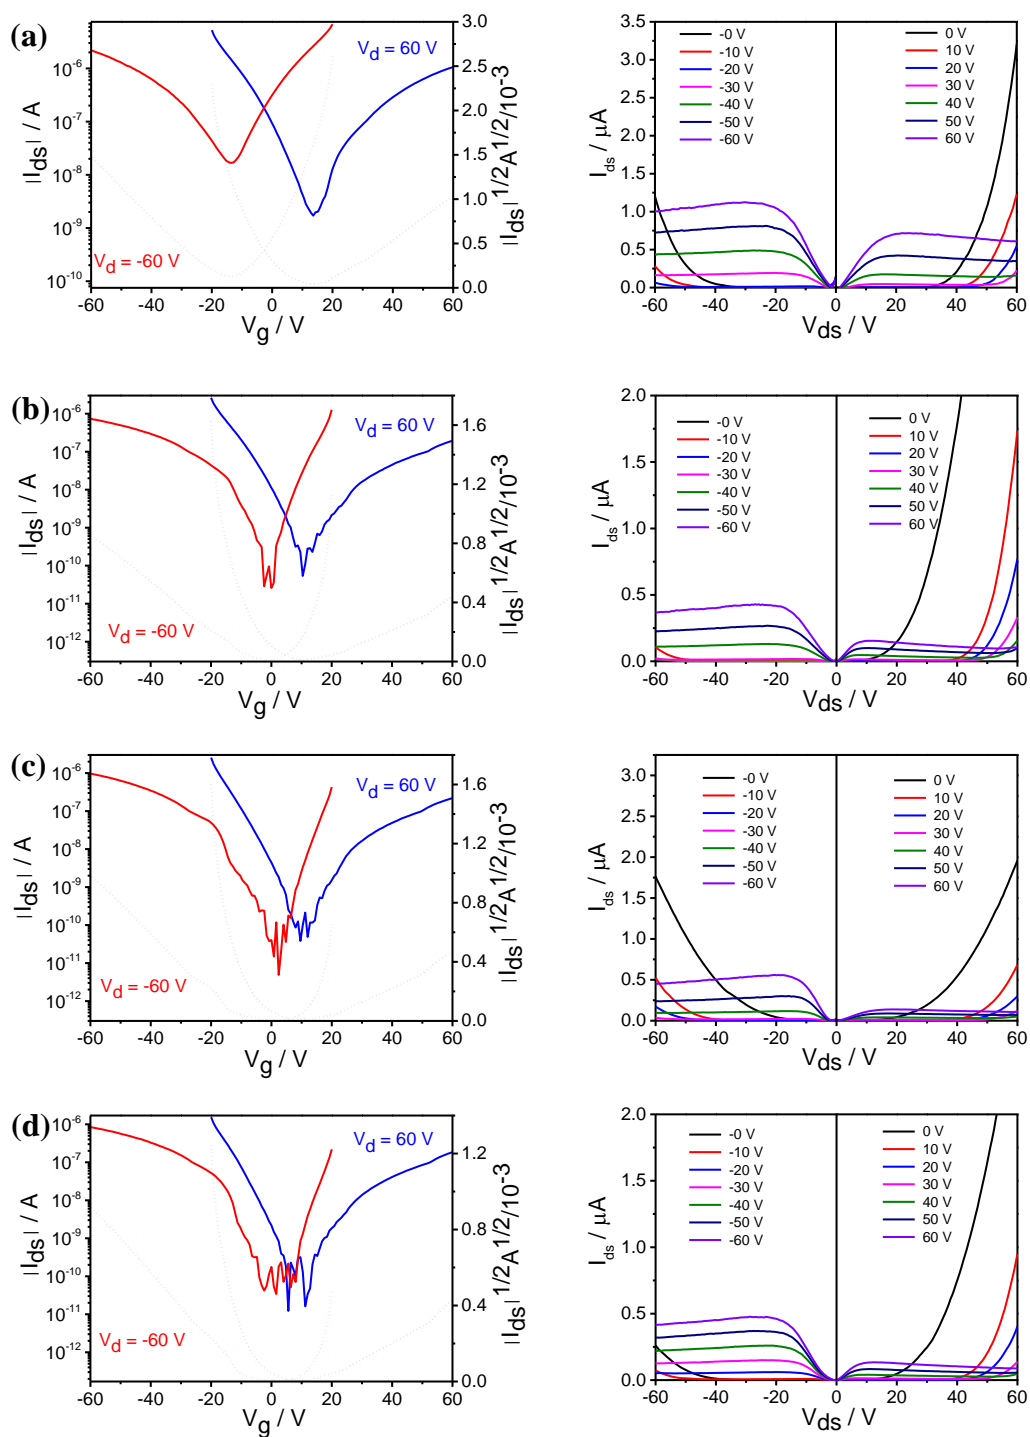

**Fig. S7** Transfer (left) and output (right) characteristic curves of BGTC transistors based on DTCDI-BNT evaluated under ambient conditions at different thermal annealing temperatures together: (a) 100°C; (b) 150°C; (c) 200°C; (d) 250°C.

## 6. NMR spectra

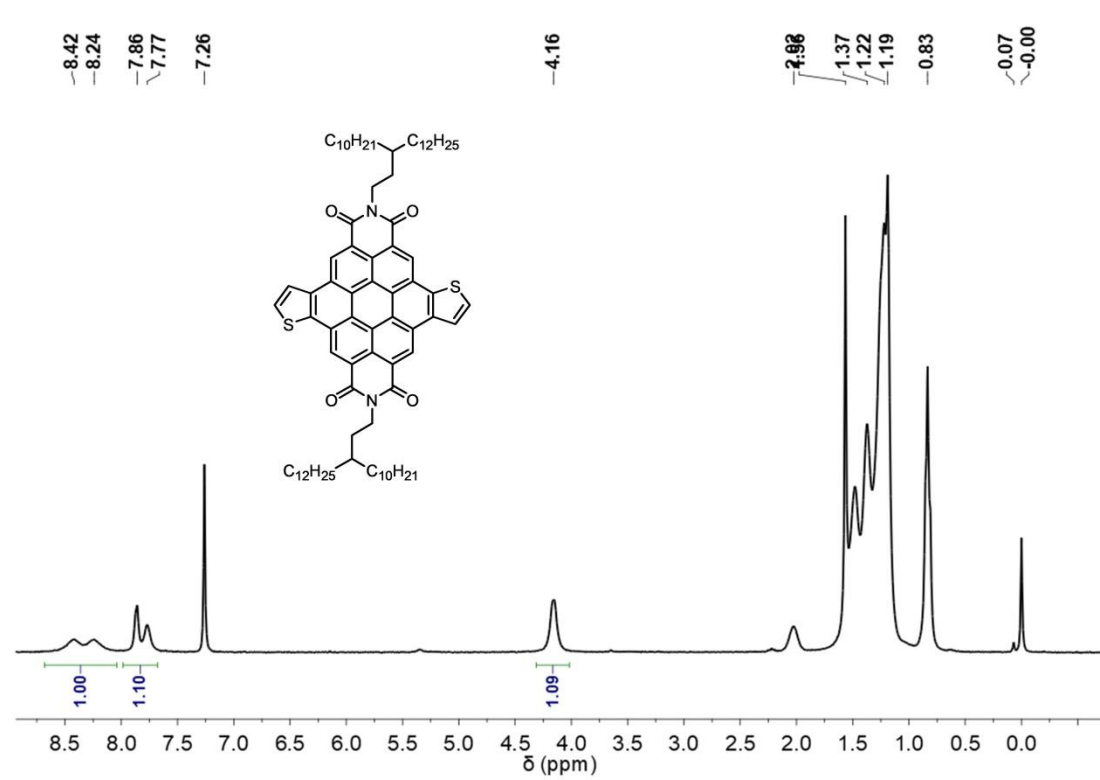

Fig. S8 <sup>1</sup>H NMR spectrum of DTCDI (400 MHz, CDCl<sub>3</sub>, r.t.)

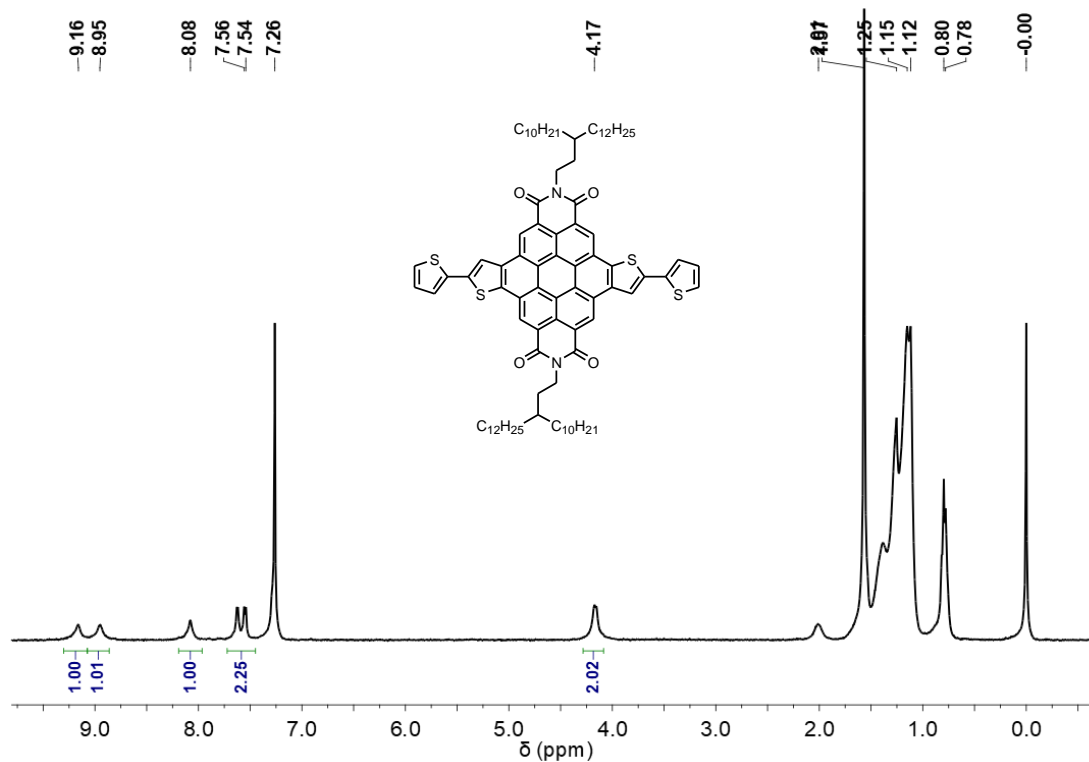

Fig. S9 <sup>1</sup>H NMR spectrum of DTCDI-BT (400 MHz, CDCl<sub>3</sub>, r.t.)

## 7. Mass spectra

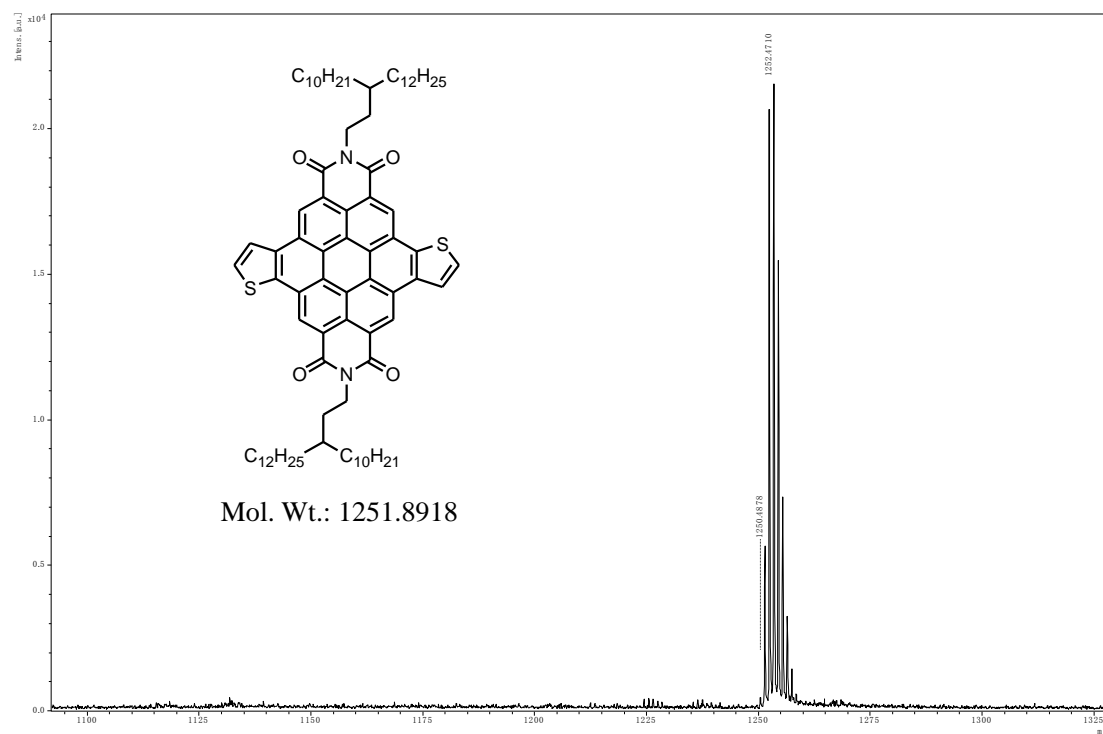

**Fig. S10** Mass spectra of DTCDI.

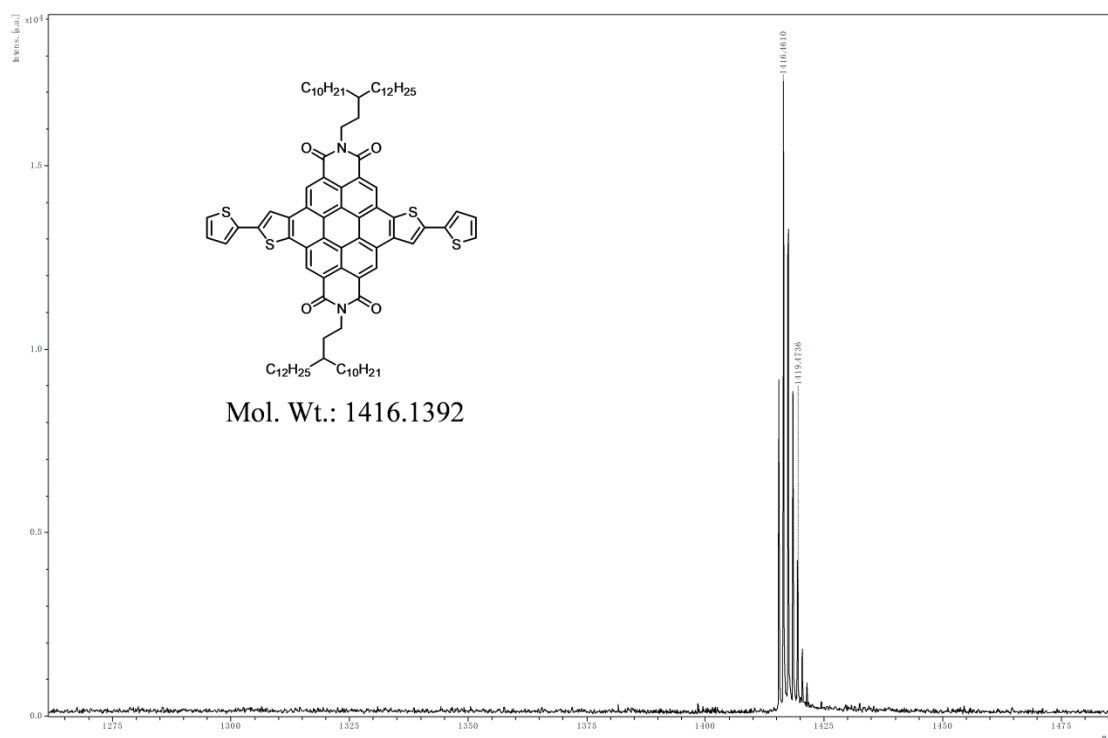

**Fig. S11** Mass spectra of DTCDI-BT.

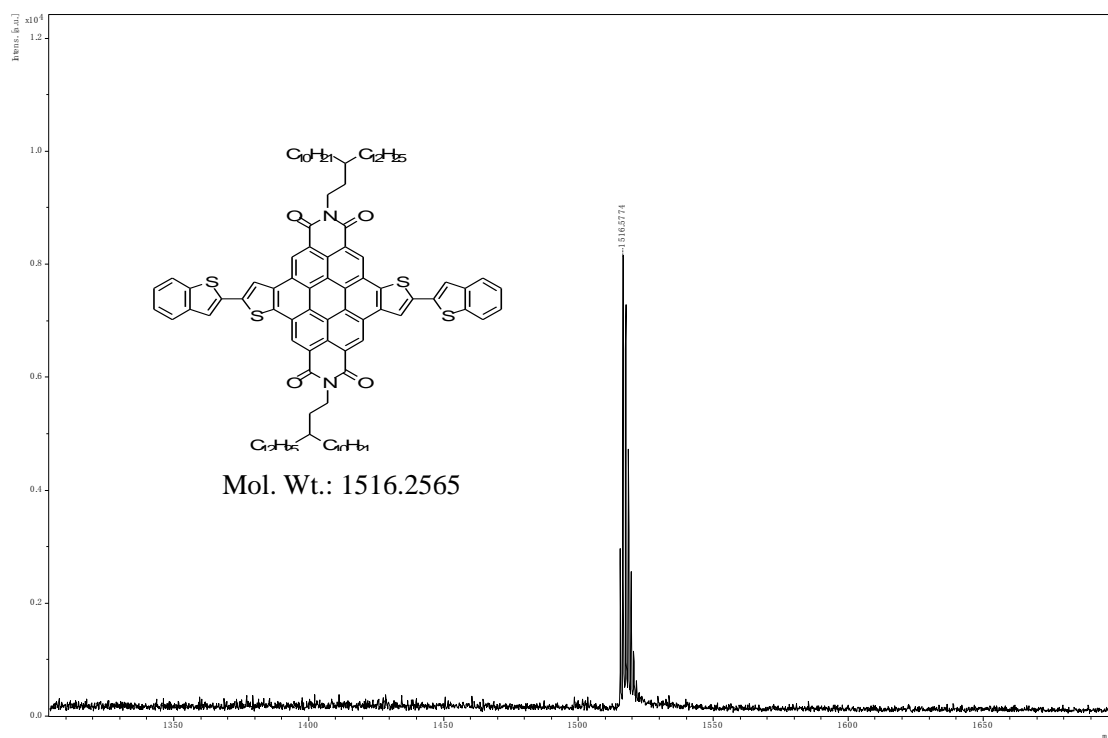

**Fig. S12** Mass spectra of DTCDI-BBT.

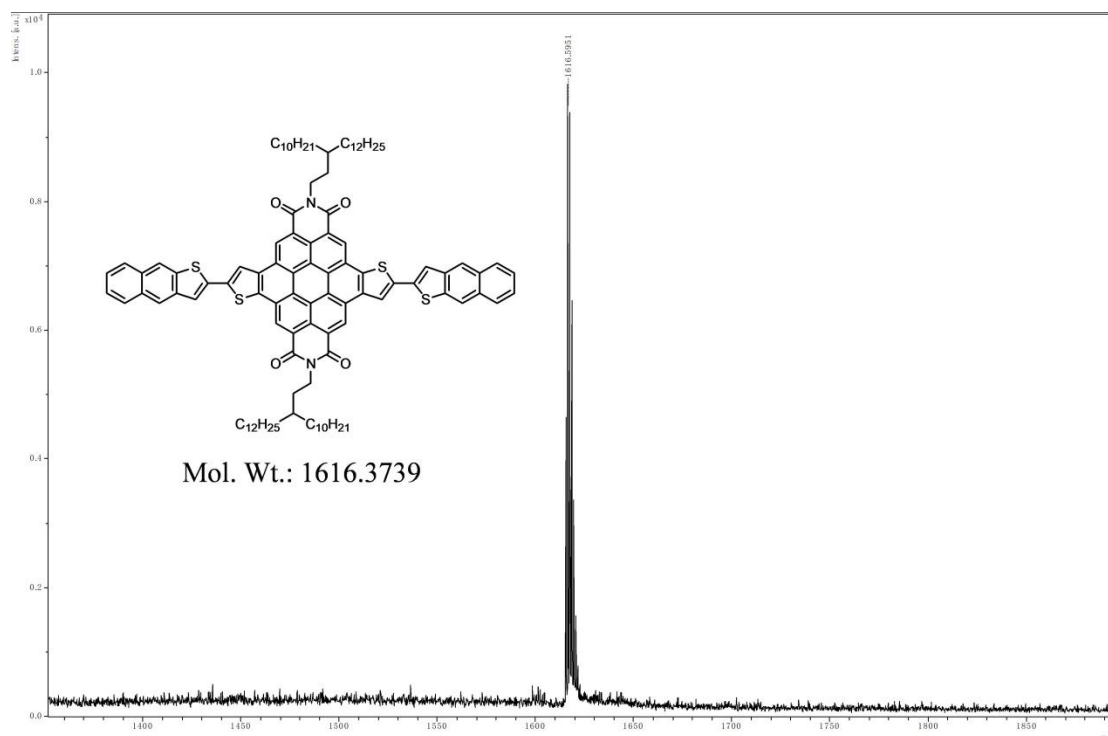

**Fig. S13** Mass spectra of DTCDI-BNT.

## 8. FT-TR spectrum

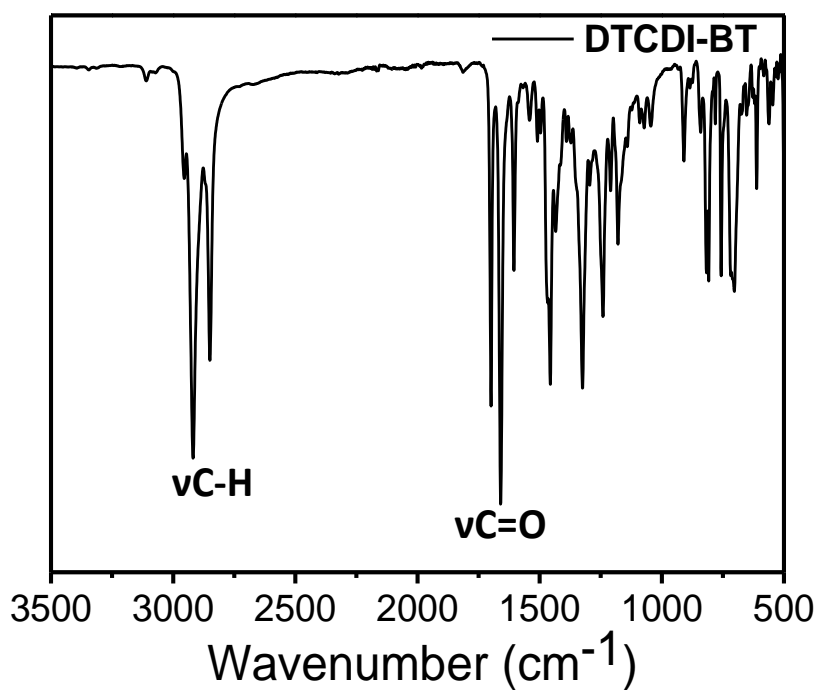

**Fig. S14** FT-IR spectra of **DTCDI-BT**.

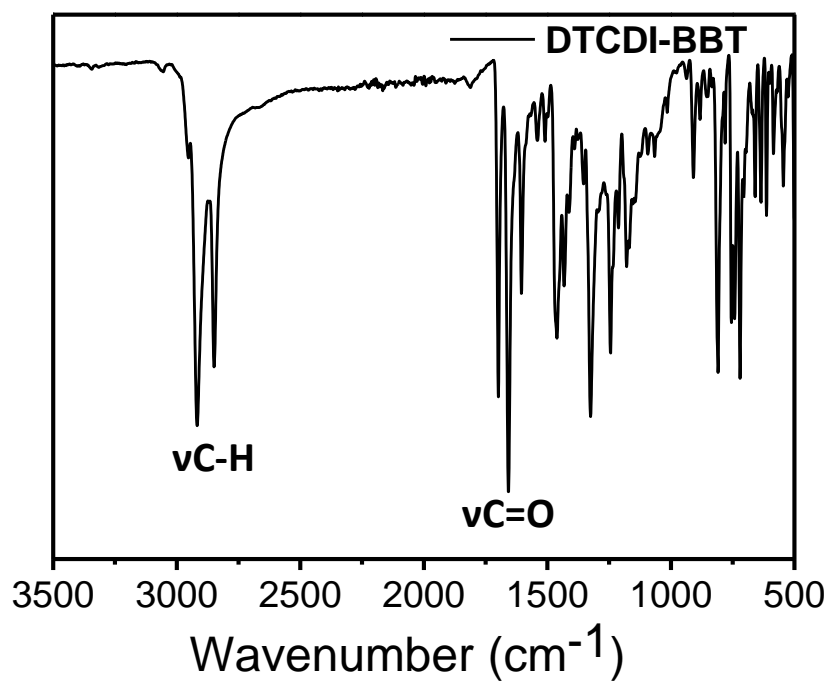

**Fig. S15** FT-IR spectra of **DTCDI-BBT**.

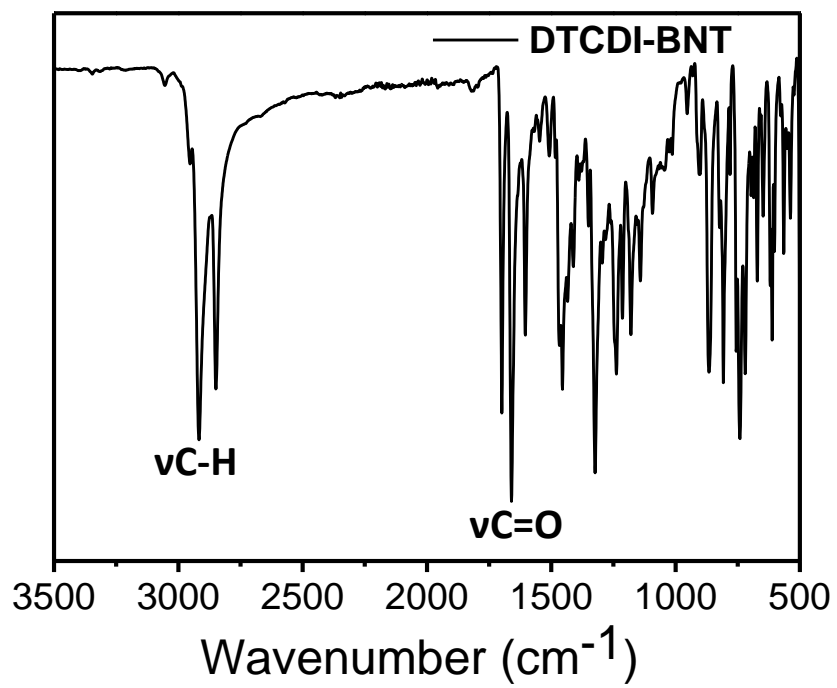

**Fig. S16** FT-IR spectra of **DTCDI-BNT**.
